## CORRECTION

## Correction: Body density and diving gas volume of the northern bottlenose whale (*Hyperoodon ampullatus*)

Patrick Miller, Tomoko Narazaki, Saana Isojunno, Kagari Aoki, Sophie Smout and Katsufumi Sato

There was an error published in *J. Exp. Biol.* **219**, 2458-2468.

Eqn 1 was presented incorrectly. A '-1' was missing after the ratio of densities, and the subscript of the first instance of the density of seawater ( $\rho_{sw}$ ) was given incorrectly as 'w' instead of 'sw'.

The original equation was:

$$a = -0.5 \times \frac{C_d \times A}{m} \times \rho_w \times v^2 + \left( \frac{\rho_{sw}}{\rho_{tissue}(d)} \right) \times g \times \sin(p) + \frac{V_{air}}{m} \times g \times \sin(p) \times \frac{\rho_{sw} - \rho_{air} \times (1 + 0.1 \times d)}{(1 + 0.1 \times d)}, \quad (1)$$

where:

$$\rho_{tissue}(d) = \frac{\rho_{tissue}(0)}{1 - r \times (1 + 0.1 \times d) \times 101,325 \times 10^{-9}}.$$

The correct equation is as follows:

$$a = -0.5 \times \frac{C_d \times A}{m} \times \rho_{sw} \times v^2 + \left( \frac{\rho_{sw}}{\rho_{tissue}(d)} - 1 \right) \times g \times \sin(p) + \frac{V_{air}}{m} \times g \times \sin(p) \times \frac{\rho_{sw} - \rho_{air} \times (1 + 0.1 \times d)}{(1 + 0.1 \times d)}, \quad (1)$$

where:

$$\rho_{tissue}(d) = \frac{\rho_{tissue}(0)}{1 - r \times (1 + 0.1 \times d) \times 101,325 \times 10^{-9}}.$$

This error was corrected on 21 September 2016 in the full-text and PDF versions of this article. The Advance Article and print version of the article remain unchanged.

The authors apologise to the readers for any inconvenience this may have caused.
